# Supplementary material
Source: MDPI journal article supplement (https://www.mdpi.com/2073-4344/12/7/783)
Supplement: s1 [file s1]

# Supplementary Materials for

## Selective Synthesis of Levulinic Ester from Furfural Catalyzed by Hierarchical Zeolites

Sancler C. Vasconcelos <sup>1</sup>, Luiz F. C. Pinhel <sup>1</sup>, Vinicius G. C. Madriaga <sup>1</sup>, Vinicius Rossa <sup>1</sup>,  
Leyliane G. S. Batinga <sup>1</sup>, Domingos S. A. Silva <sup>2</sup>, Rodrigo D. dos Santos <sup>3</sup>, André V. H. Soares  
<sup>4</sup>, Ernesto A. Urquieta-González <sup>2</sup>,  
Fabio Barboza Passos <sup>4</sup>, Rajender S. Varma <sup>5,\*</sup>, and Thiago M. Lima <sup>1,\*</sup>

<sup>1</sup> Instituto de Química, Campus do Valonguinho, Universidade Federal Fluminense, Outeiro São João Batista, s/n, , Centro, Niterói, Rio de Janeiro 24020-141, Brazil; sanclervasconcelos@id.uff.br (S.C.V.); luizfcp@id.uff.br (L.F.C.P.); viniciusmadriaga@gmail.com (V.G.C.M.); vinnyrossa@gmail.com (V.R.); leylianebatinga@id.uff.br (L.G.S.B.)

<sup>2</sup> Departamento de Engenharia Química, Universidade Federal de São Carlos, Rod. Washington Luis, km 235, São Carlos, São Paulo 13565-905, Brazil; sergio13es@hotmail.com (D.S.A.S.); urquieta@ufscar.br (E.A.U.-G.)

<sup>3</sup> Instituto de Física, Campus da Praia Vermelha, Universidade Federal Fluminense, Av. Gal. Milton Tavares de Souza, s/n, , Niterói, Rio de Janeiro 24210-346, Brazil; rodiassantos@id.uff.br

<sup>4</sup> Departamento de Engenharia Química e de Petróleo, Universidade Federal Fluminense, Rua Passo da Pátria, 156, Niterói, Rio de Janeiro 24210-240, Brazil; andrevhs@id.uff.br (A.V.H.S.); fabiopassos@id.uff.br (F.B.P.)

<sup>5</sup> Regional Centre of Advanced Technologies and Materials, Czech Advanced Technology and Research Institute, Palacký University, Šlechtitelů 27, 783 71 Olomouc, Czech Republic

\* Correspondence: varma.rajender@epa.gov (R.S.V.); tmlima@id.uff.br (T.M.L.)

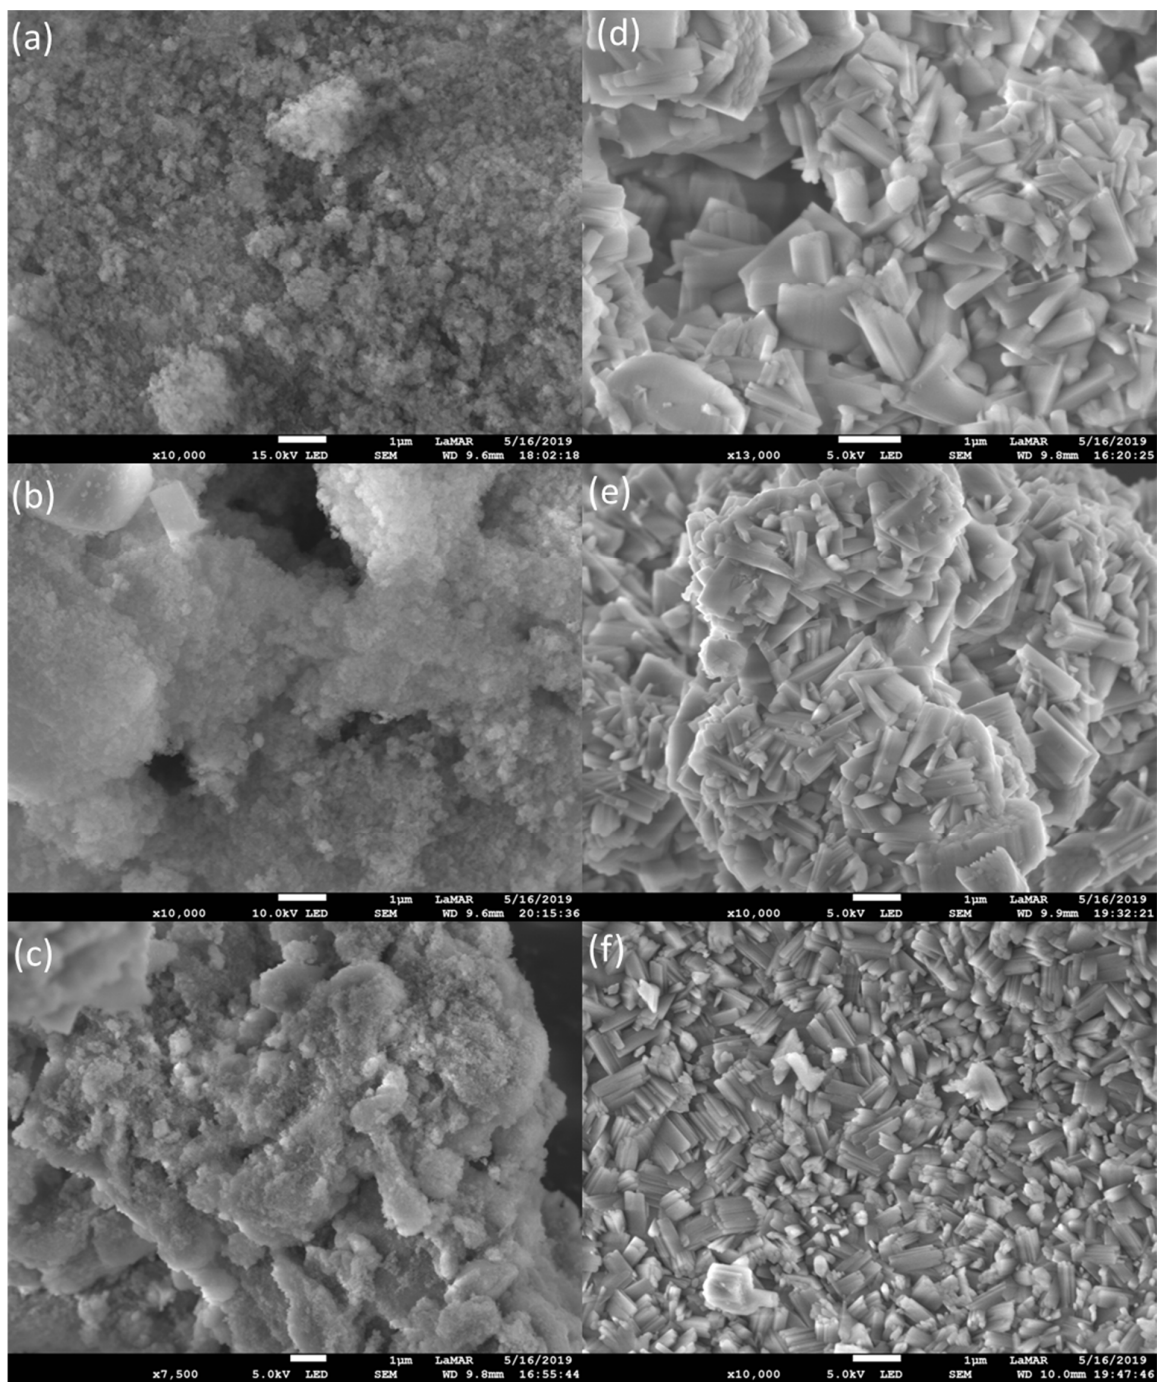

**Figure S1.** SEM images for the (a,b,c) beta and (d,e,f) mordenite samples.

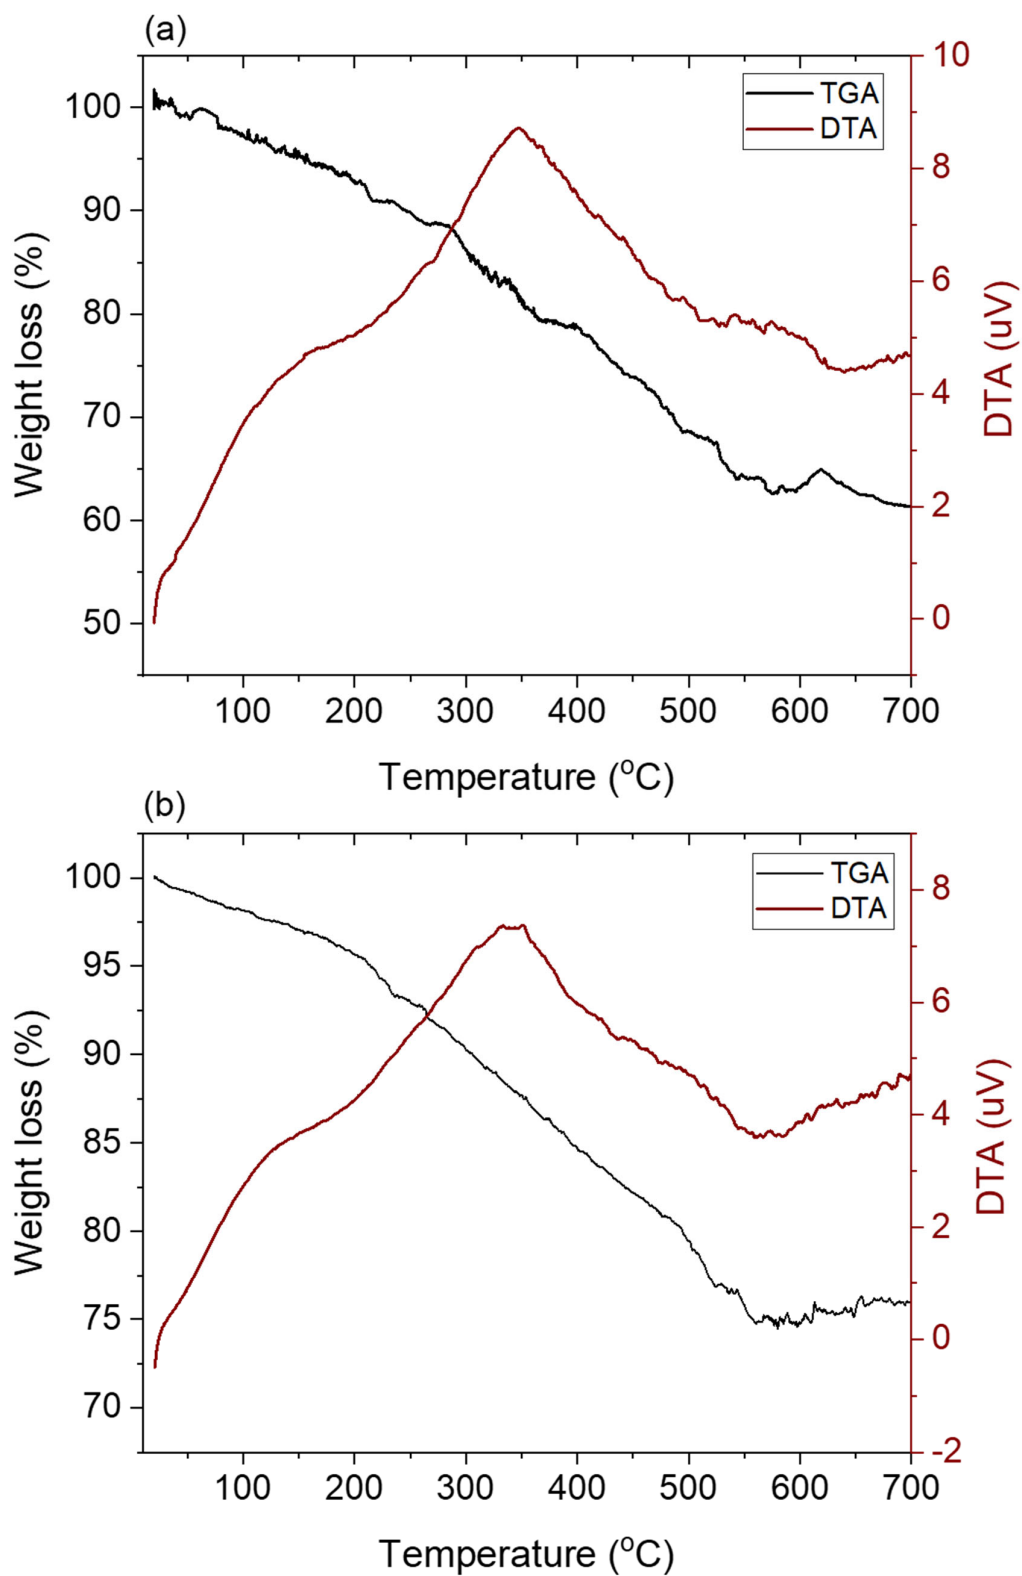

**Figure S2.** TGA analyses of the (a) commercial beta zeolite and (b) alkali-treated beta zeolite after the 2<sup>nd</sup> reuse in the furfural upgrading reaction.

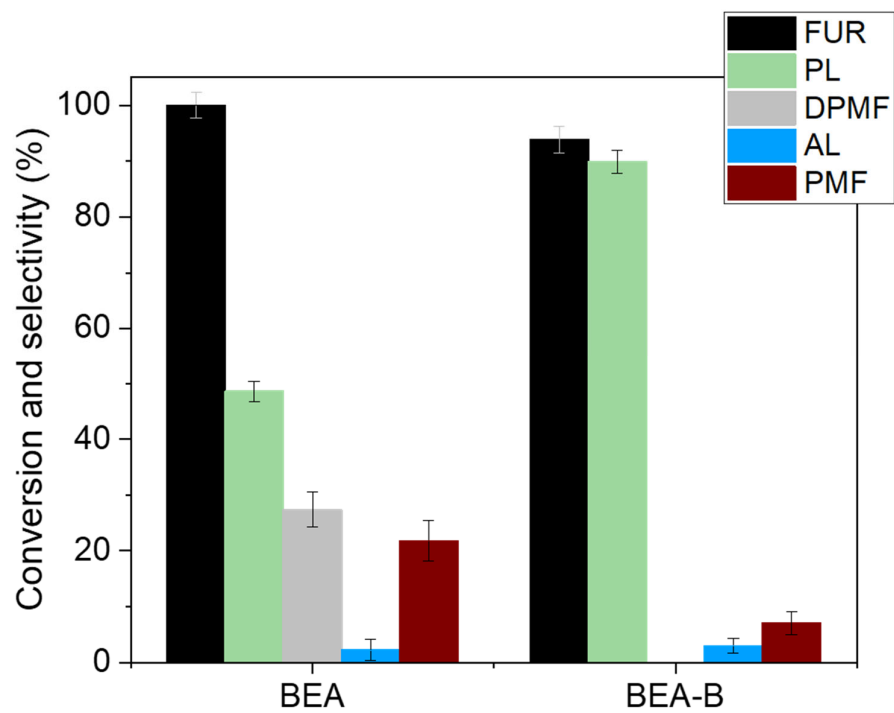

**Figure S3.** Experiments performed in triplicate for the commercial beta zeolite and alkali-treated beta zeolite in the furfural upgrading reaction.

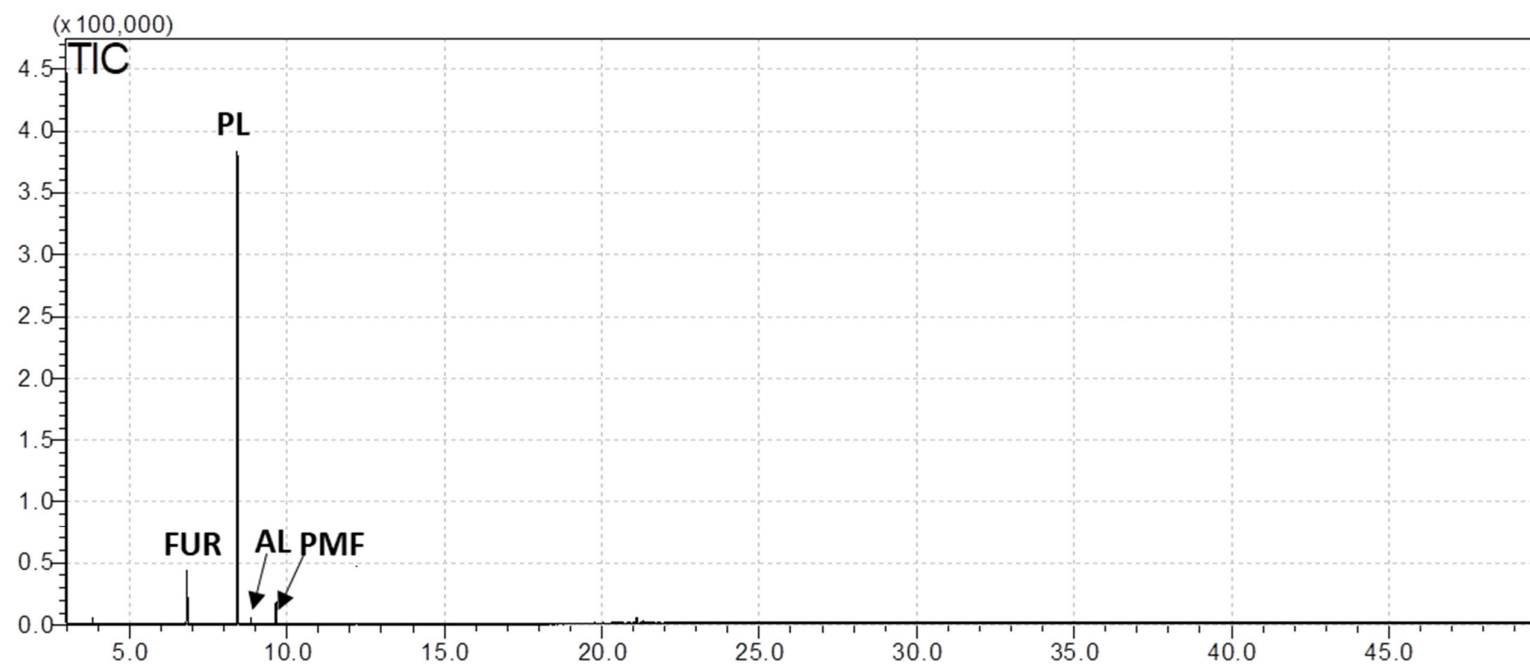

**Figure S4.** Typical chromatogram for the catalytic upgrading of furfural via domino reaction using BEA-B as a catalyst.

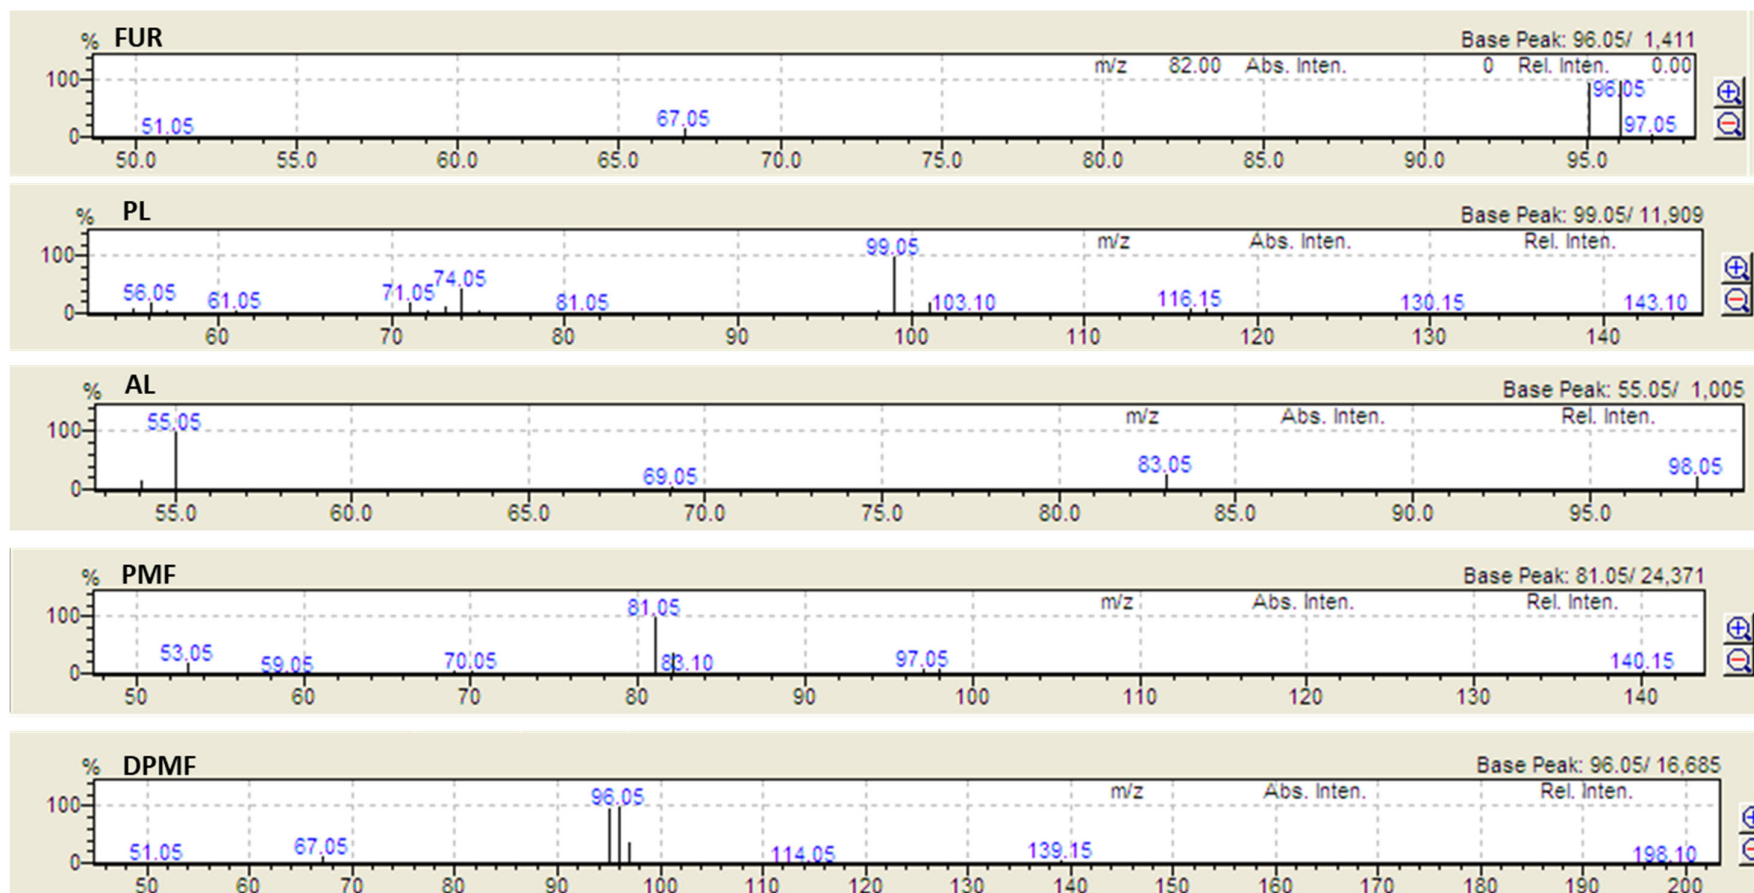

Figure S5. Mass spectra of the products detected in the catalytic upgrading of furfural via domino reaction zeolites as catalysts.

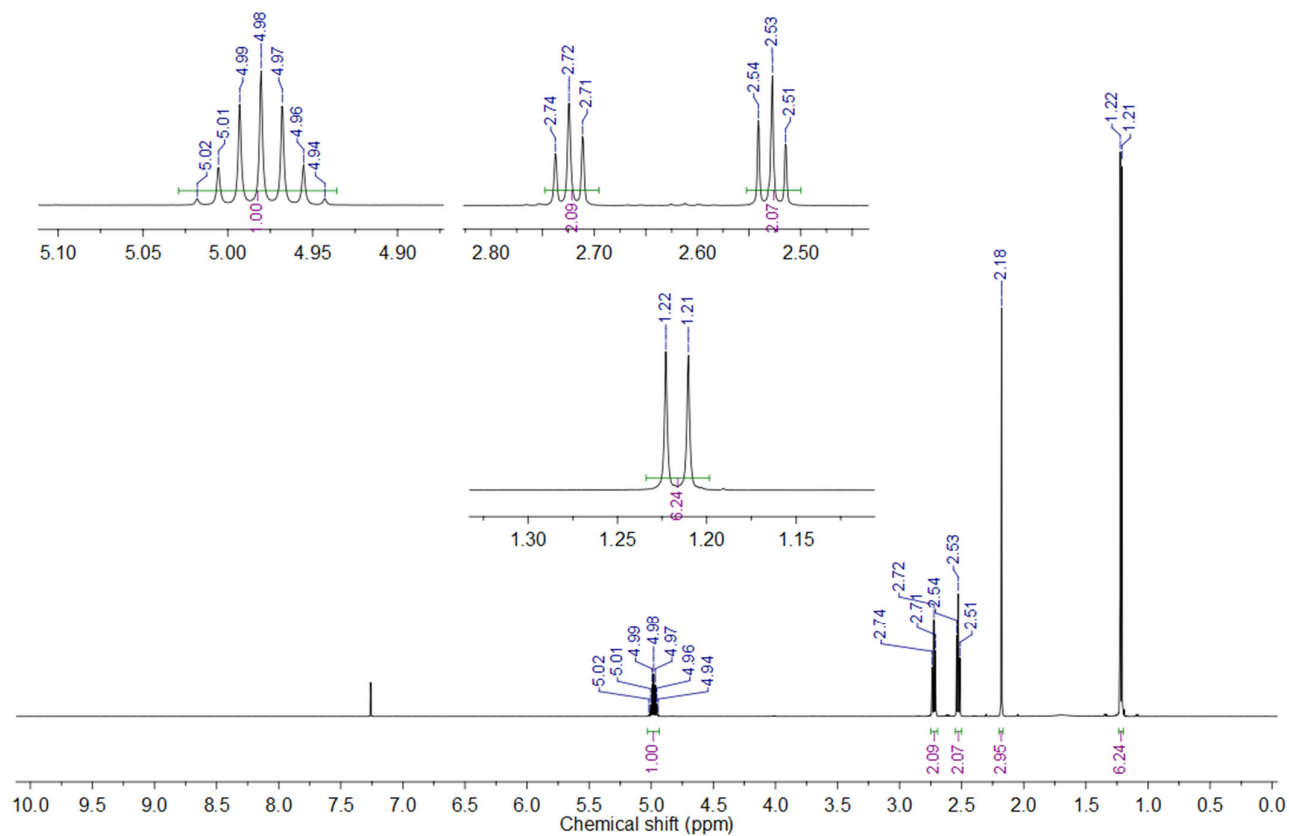

**Figure S6.**  $^1\text{H}$ -NMR spectrum of isopropyl levulinate obtained from the reaction performed at optimized conditions using BEA-B as a catalyst. (500 MHz,  $\text{CDCl}_3$ ).  $\delta$  4.98 (hept,  $J = 6.3$  Hz, 1H), 2.72 (t,  $J = 6.6$  Hz, 2H), 2.53 (t,  $J = 6.6$  Hz, 2H), 2.18 (s, 3H), 1.22 (d,  $J = 6.3$  Hz, 6H).

1. Rouquerol, F.; Rouquerol, J.; Sing, K. *Adsorption by Powders and Porous Solids*; Elsevier, 1999; ISBN 9780125989206.
2. Tamura, M.; Shimizu, K.; Satsuma, A. Comprehensive IR Study on Acid/Base Properties of Metal Oxides. *Appl. Catal. A Gen.* **2012**, *433–434*, 135–145, doi:10.1016/j.apcata.2012.05.008.
3. Jorge, E.Y.C.; Lima, T. de M.; Lima, C.G.S.; Marchini, L.; Castelblanco, W.N.; Rivera, D.G.; Urquieta-González, E.A.; Varma, R.S.; Paixão, M.W. Metal-Exchanged Magnetic  $\beta$ -Zeolites: Valorization of Lignocellulosic Biomass-Derived Compounds to Platform Chemicals. *Green Chem.* **2017**, *19*, 3856–3868, doi:10.1039/C7GC01178D.
4. Jorge, E.Y.C.; Lima, C.G.S.; Lima, T.M.; Marchini, L.; Gawande, M.B.; Tomanec, O.; Varma, R.S.; Paixão, M.W. Sulfonated Dendritic Mesoporous Silica Nanospheres: A Metal-Free Lewis Acid Catalyst for the Upgrading of Carbohydrates. *Green Chem.* **2020**, *22*, 1754–1762, doi:10.1039/C9GC03489G.
